# Supplementary material for: Critical role of sigma-1 receptors in central neuropathic pain-related behaviours after mild spinal cord injury in mice
Source: PubMed Central journal article supplement (PMC5832850; doi:10.1038/s41598-018-22217-9), 2018-03-01

## Supplementary Information

### Critical role of sigma-1 receptors in central neuropathic pain-related behaviours after mild spinal cord injury in mice

Sílvia Castany<sup>1,2</sup>, Georgia Gris<sup>2</sup>, José Miguel Vela<sup>2</sup>, Enrique Verdú<sup>1\*</sup>, and Pere Boadas-Vaello<sup>1\*</sup>

<sup>1</sup> Research Group of Clinical Anatomy, Embryology and Neuroscience (NEOMA), Department of Medical Sciences, Universitat de Girona (UdG), Girona, Spain.

<sup>2</sup> ESTEVE, Drug Discovery and Preclinical Development, Parc Científic de Barcelona, Barcelona, Catalonia, Spain.

**Supplementary Figure S1:** Full-length blot images corresponding to the cropped western blot presented in Figure 3

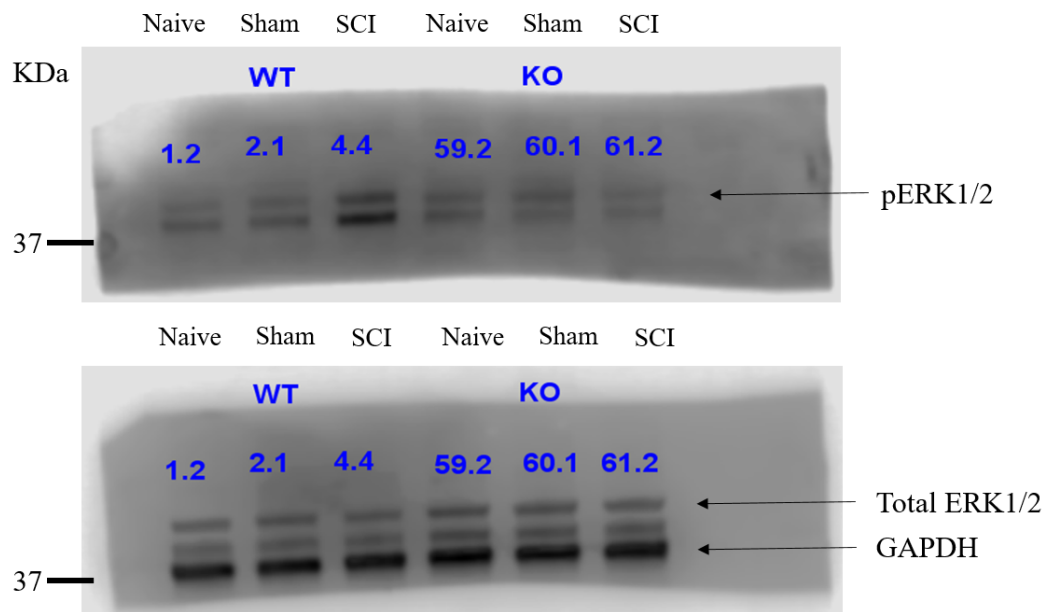

**Supplementary Figure S2:** Full-length blot images corresponding to the cropped western blot presented in (a) Figure 4A and (b) Figure 4B

**(a):**

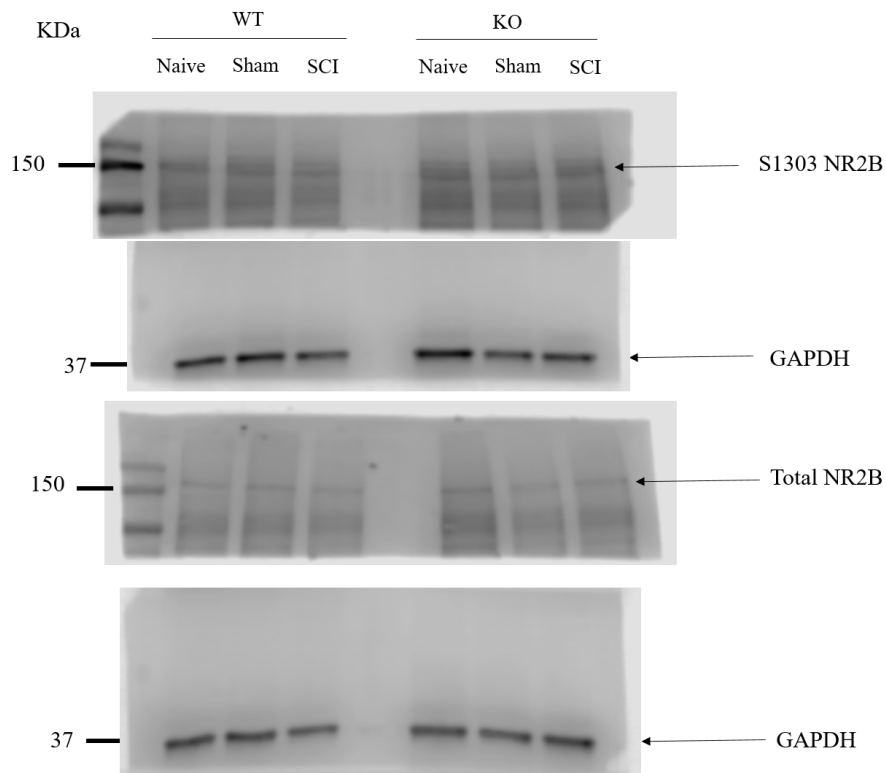

**(b):**

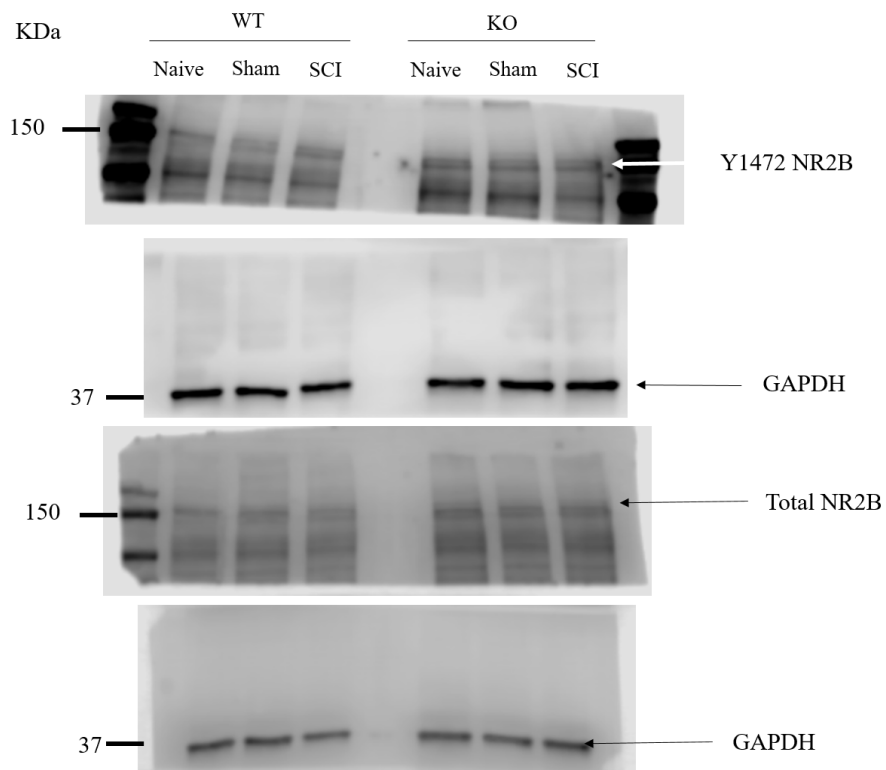

**Supplementary Figure S3:** Full-length blot images corresponding to the cropped western blot presented in (a) Figure 5A and (b) Figure 5B

**(a):**

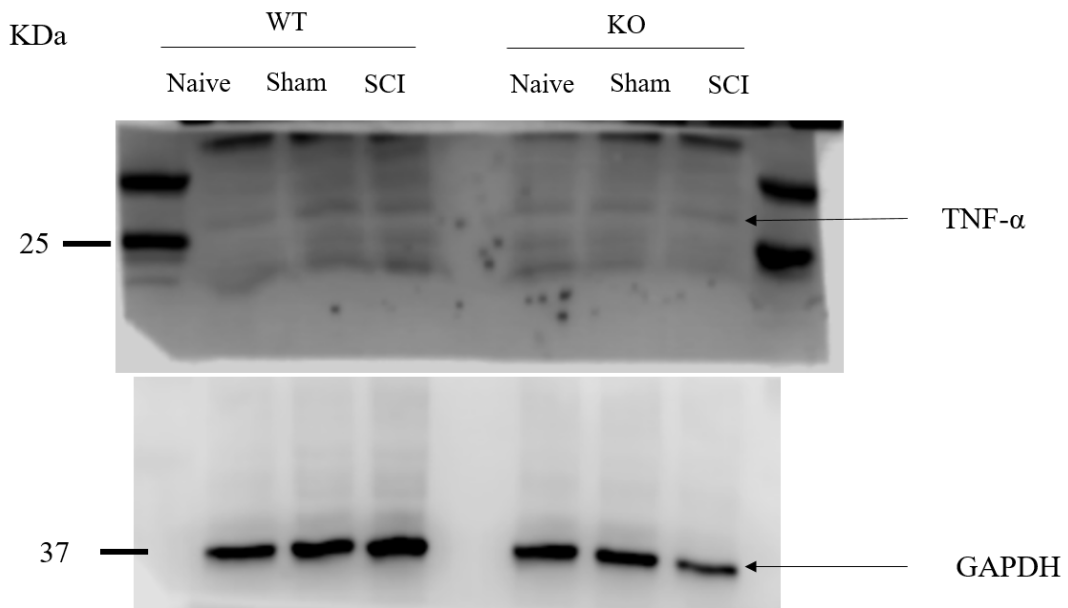

**(b):**

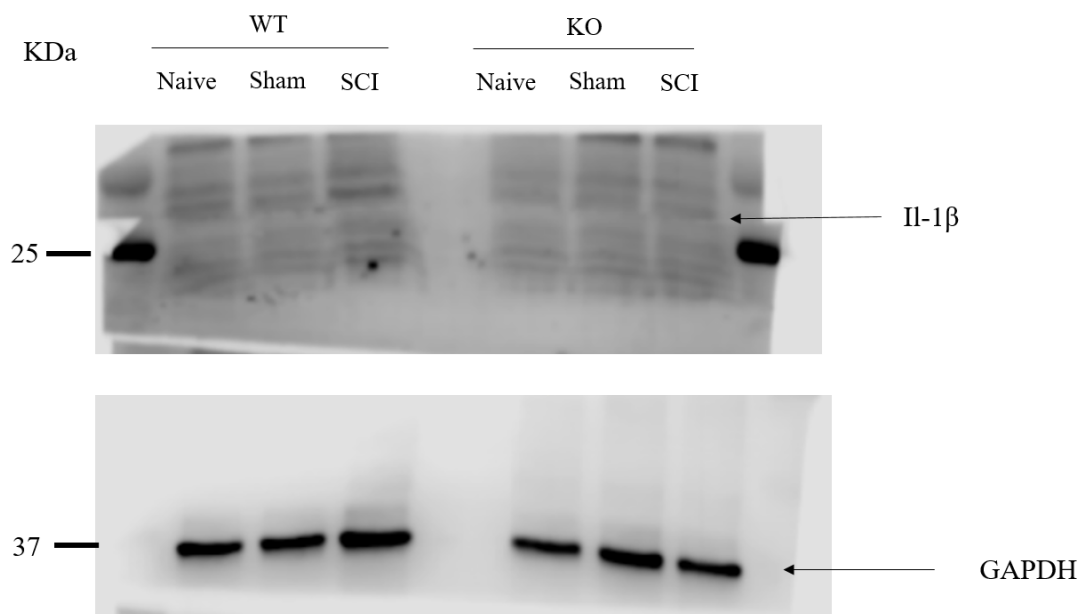

Supplement: 41598_2018_22217_MOESM1_ESM.pdf [file 41598_2018_22217_MOESM1_ESM.pdf]
